# Supplementary material
Source: PubMed Central journal article supplement (PMC2948439)
Supplement: NIHMS236732-supplement-Table_anf_Fig_Legends.pdf [file NIHMS236732-supplement-Table_anf_Fig_Legends.pdf]

Figure 1. Presenting DSM-IV Symptoms in a Clinical Sample of Adults with ADHD. Endorsed symptoms were reported by adults with ADHD by structured clinical interviews. Data are presented as percentage of subjects endorsing each DSM-IV specific symptom of ADHD.
